# Supplementary material
Source: HighWire-hosted journal article supplement (https://www.jrheum.org/highwire/filestream/39936/field_highwire_adjunct_files/0/201317DataSuppl.pdf)
Supplement: 201317DataSuppl.pdf [file 201317DataSuppl.pdf]

## ONLINE SUPPLEMENTARY MATERIAL

### Supplementary Data. Psoriatic arthritis FLARE questionnaire

*These symptoms have been suggested by people having a 'flare up' of their disease. Please answer*

|                                                                                                         | Yes | No |
|---------------------------------------------------------------------------------------------------------|-----|----|
| <b>Have you recently experienced:</b>                                                                   |     |    |
| A change/increase in itchiness of your skin                                                             |     |    |
| A recent change/increase in the area of skin involved                                                   |     |    |
| A recent change/increase in joint pain                                                                  |     |    |
| A recent change/increase in the number of tender and/or sore joints                                     |     |    |
| A recent change/decrease in ability to perform activities of daily living, such as washing and dressing |     |    |
| A recent change/decrease in ability to move easily                                                      |     |    |
| A recent change/increase in frustration                                                                 |     |    |
| A recent change/increase in depression                                                                  |     |    |
| A recent change/increase in feeling of tiredness all the time                                           |     |    |
| A recent change/increase in the number or combination of symptoms from your disease                     |     |    |

*'yes' or 'no' to these questions.*

FLARE questionnaire scoring: score 1 point for every positive answer

**Supplementary Figure 1.** ASSESS study flow chart.

ASSESS study follow up schedule

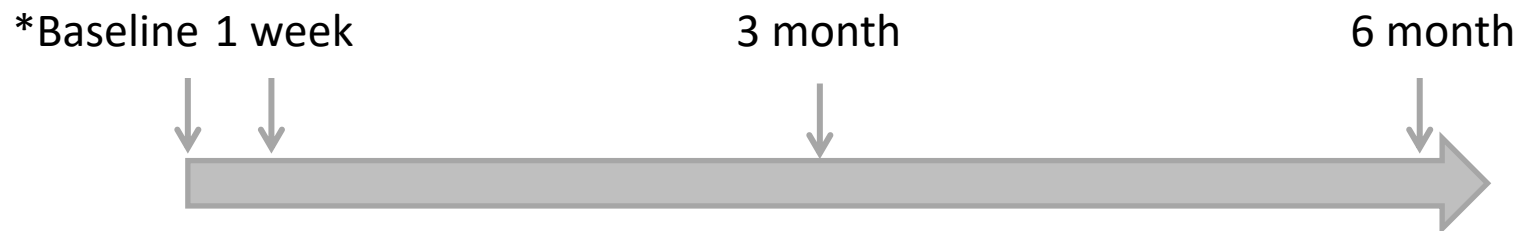

Key

139 patients were recruited to the study for follow up over six months

29 participants attended for text reliability at week 1

All study clinical and patient reported assessments were performed at each visit; baseline, week 1, 3-month and 6-month visits
